# Supplementary material for: A non-stationary climate-informed weather generator for assessing future flood risks
Source: Copernicus journal article supplement (doi:10.5194/ascmo-10-195-2024), 2024-11-26
Supplement: Supplementary file 1 [file ascmo-10-195-2024-supplement.pdf]

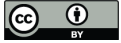

*Supplement of*

## **A non-stationary climate-informed weather generator for assessing future flood risks**

**Viet Dung Nguyen et al.**

*Correspondence to:* Viet Dung Nguyen (dung@gfz-potsdam.de)

The copyright of individual parts of the supplement might differ from the article licence.

## Supplement

**Table S1.** CMIP6 General Circulation Models used for subsequent screening and weighting in the ClimWIP approach.

| <b>Modelling center</b>                                                                                | <b>GCM</b>    | <b>Realization</b> | <b>Spatial resolution (in °)</b> |
|--------------------------------------------------------------------------------------------------------|---------------|--------------------|----------------------------------|
| Beijing Climate Center                                                                                 | BCC-CSM2-MR   | r1i1p1f1           | 1.13                             |
| Canadian Centre for Climate Modelling and Analysis                                                     | CanESM5       | r1i1p1f1           | 2.81                             |
| National Center for Atmospheric Research                                                               | CESM2         | r1i1p1f1           | 1.10                             |
| Centre National de Recherches Météorologiques and Centre Européen de Recherche et de Formation Avancée | CNRM-CM6-1    | r1i1p1f2           | 1.41                             |
| EC-Earth-Consortium                                                                                    | EC-Earth3     | r1i1p1f1           | 0.7                              |
| LASG/IAP, Beijing, China                                                                               | FGOALS-g3     | r1i1p1f1           | 2.13                             |
| Geophysical Fluid Dynamics Laboratory                                                                  | GFDL-CM4      | r1i1p1f1           | 1                                |
| Geophysical Fluid Dynamics Laboratory                                                                  | GFDL-ESM4     | r1i1p1f1           | 1                                |
| Met Office Hadley Centre and Natural Environment Research Council                                      | UKESM1-0-LL   | r1i1p1f1           | 1.59                             |
| Institute for Numerical Mathematics, Russian Academy of Sciences                                       | INM-CM5-0     | r1i1p1f1           | 1.77                             |
| Institut Pierre Simon Laplace                                                                          | IPSL-CM6A-LR  | r1i1p1f1           | 1.98                             |
| JAMSTEC, AORI, NIES and R-CCS                                                                          | MIROC6        | r1i1p1f1           | 1.41                             |
| Max Planck Institute for Meteorology                                                                   | MPI-ESM1-2-HR | r1i1p1f1           | 0.94                             |
| Meteorological Research Institute                                                                      | MRI-ESM2-0    | r1i1p1f1           | 1.13                             |
| Norwegian Climate Center                                                                               | NorESM2-LM    | r1i1p1f1           | 2.21                             |

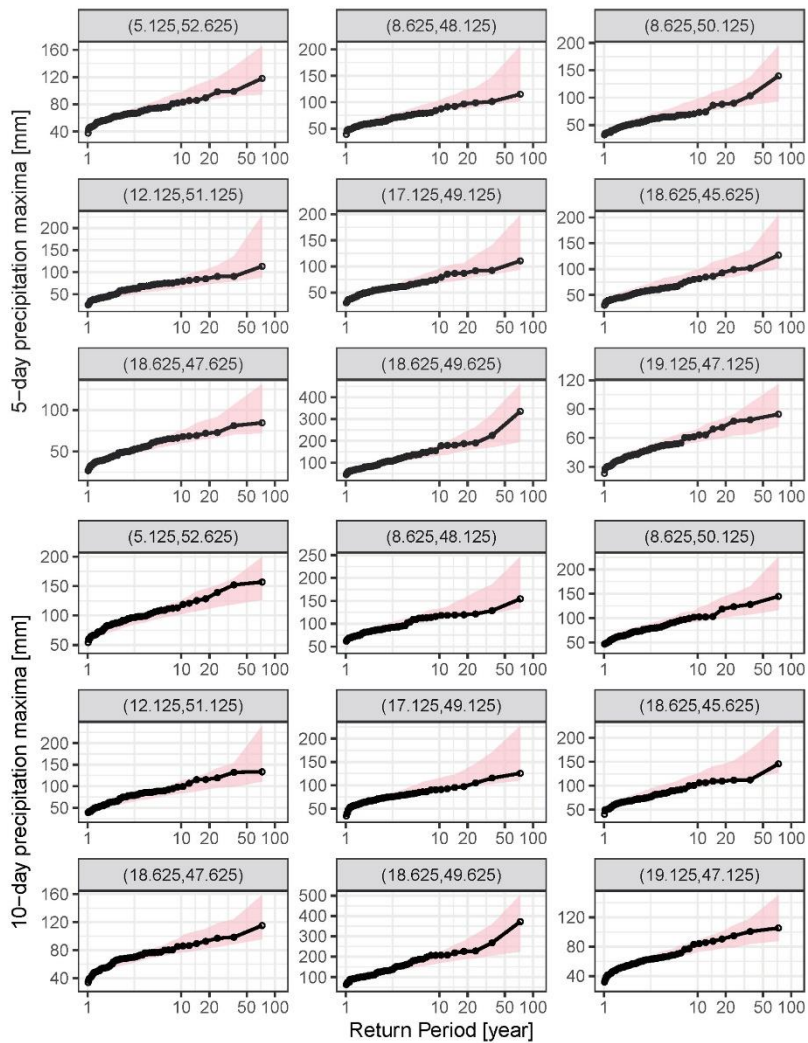

**Figure S1:** Frequency plots of observed (black) and simulated multi-day extreme precipitation totals (red ranges) accumulated over 5-day (upper panel) and 10-day (lower panel) periods at nine selected grid locations given by the geographical coordinates (lon/lat) in the title of each. Observed multi-day precipitation frequency based on E-OBS is shown in black. Note the log-scale of the x-axis. The Weibull plotting positions are used to estimate the return periods

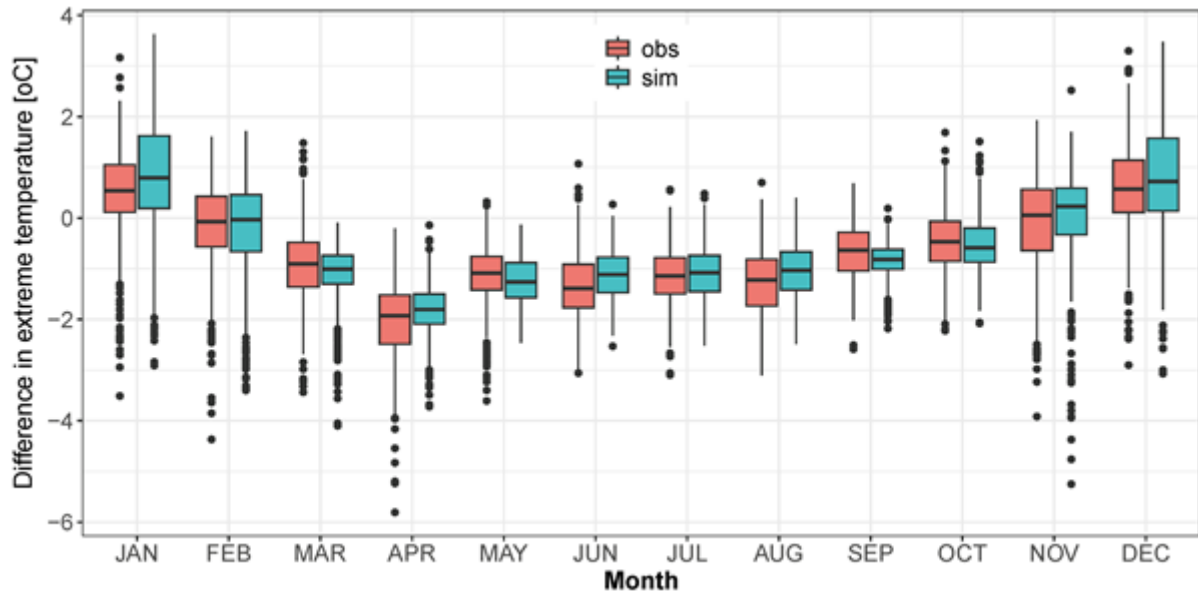

**Figure S2:** Boxplot demonstrating the difference between extreme temperatures (99.5th percentile) for dry and wet states (y-axis) in both the observed and synthetic data plotted across 12 months (x-axis). Boxes show the distribution across all locations in the modelled domain.
